# Supplementary material
Source: PubMed Central journal article supplement (PMC5065655)
Supplement: mmc1.pdf [file mmc1.pdf]

**The American Journal of Human Genetics, Volume 99**

**Supplemental Data**

**Mutations in *GLDN*, Encoding Gliomedin,  
a Critical Component of the Nodes of Ranvier,  
Are Responsible for Lethal Arthrogryposis**

**Jérôme Maluenda, Constance Manso, Loic Quevarec, Alexandre Vivanti, Florent Marguet, Marie Gonzales, Fabien Guimiot, Florence Petit, Annick Toutain, Sandra Whalen, Romulus Grigorescu, Anne Dieux Coeslier, Marta Gut, Ivo Gut, Annie Laquerrière, Jérôme Devaux, and Judith Melki**

## SUPPLEMENTAL DATA

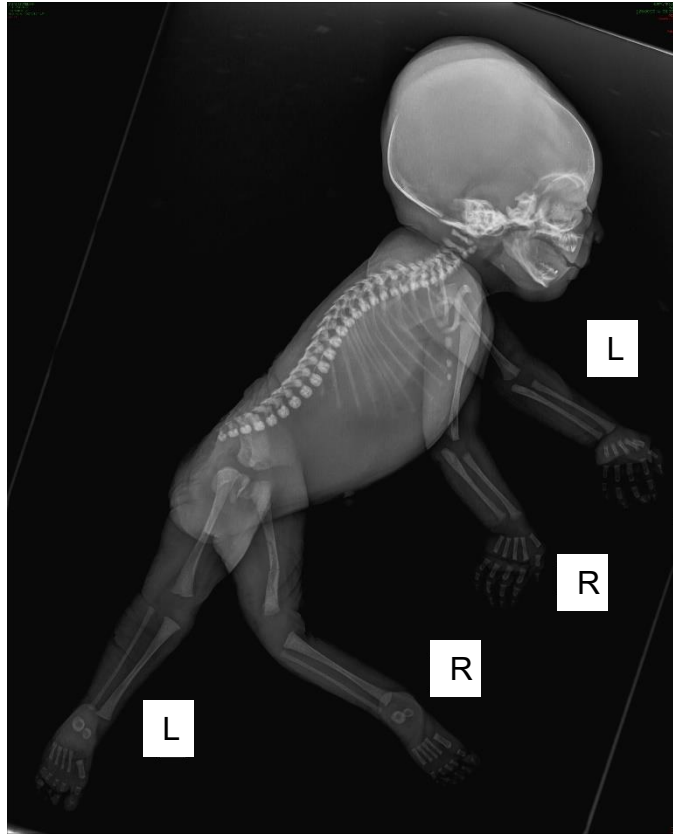

**Figure S1:** X-ray of affected individual II:1 of family 1 revealed marked extension of lower limbs associated with extension of handles and anomalies of the thoracic spine. L: left; R: right

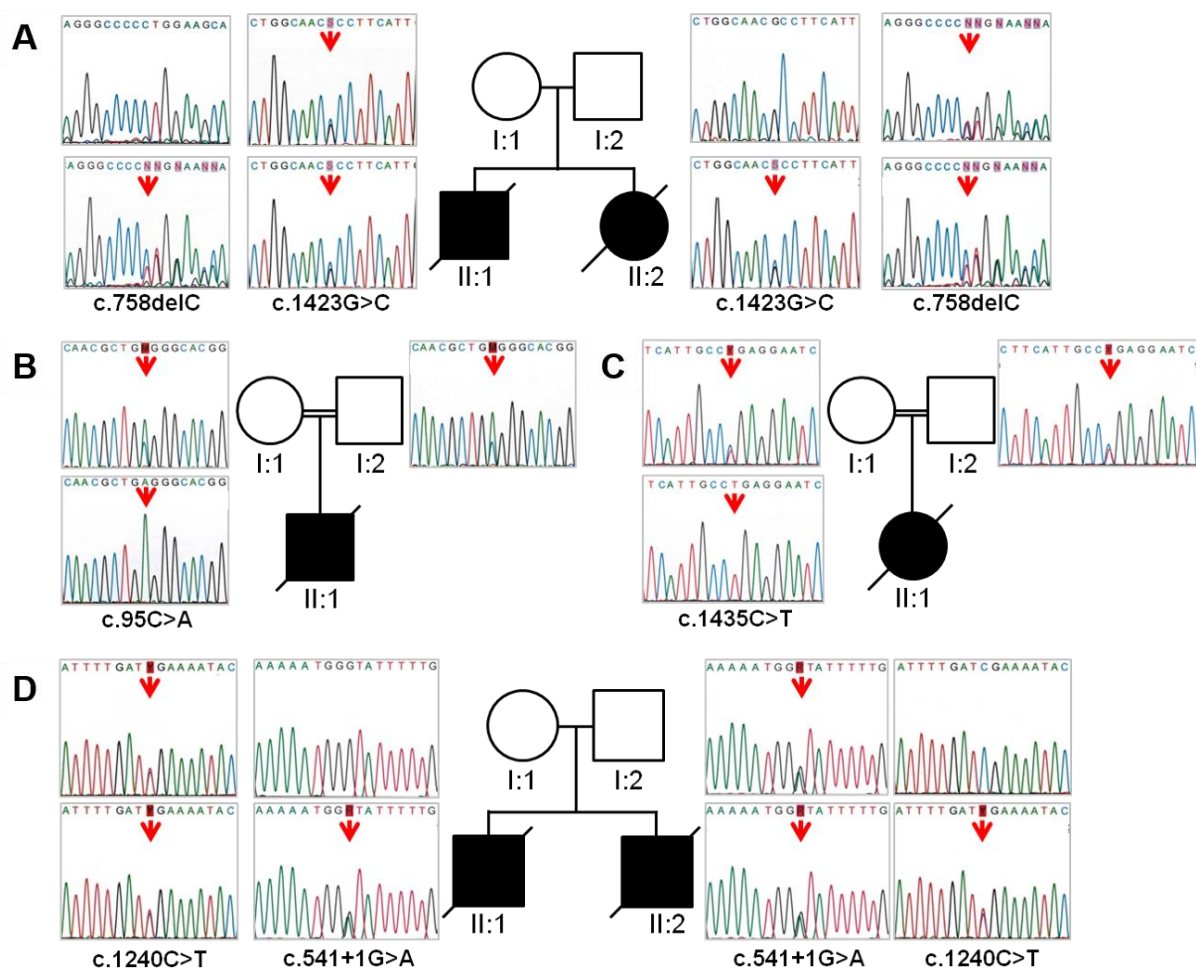

**Figure S2: Sanger sequencing of mutations identified in *GLDN* in AMC families.** Pedigrees for families 1 (A), 2 (B) and 3 (D) and 4 (C) are shown. Arrows indicate mutant nucleotide positions. The nucleotide changes based on NM\_181789.2 reference sequence are indicated. Open symbols: unaffected; filled symbols: affected.

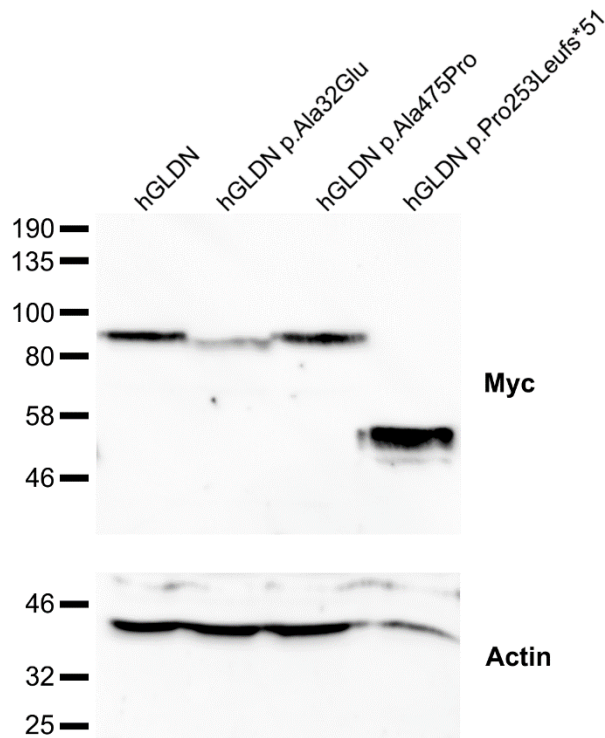

**Fig. S3: Protein levels of *GLDN* mutants.** Cell lysates were prepared from CHO cells transiently transfected with myc-tagged human WT and mutant gliomedin (hGLDN). Cells were solubilized in 1% Triton X-100, 140 mM NaCl, 20 mM Tris-HCl, pH 7.4 containing protease inhibitors (2 mM EDTA, 1  $\mu$ g/ml Leupeptin, 1  $\mu$ g/ml Aprotinin, and 0.5 mM Phenylmethylsulfonyl Fluoride, Sigma-Aldrich), agitated on ice for 15 min, then centrifuged at 18,900 X *g* for 30 min. The supernatants were saved and the protein concentrations were determined using the BCA kit (Sigma-Aldrich). 100  $\mu$ g (WT, p.Ala32Glu, and p.Ala475Pro) and 25  $\mu$ g (p.Pro253Leufs\*51) of proteins were denatured in SDS sample buffer for 2 min at 90°C, then separated on 7.5% SDS-PAGE gels and transferred onto nitrocellulose membranes. The membranes were blocked for 1 hour using 5% powdered skim milk in PBS with 0.5% Tween-20 and incubated with a mouse monoclonal antibody Myc (1/1,000; Roche), or a rabbit antiserum against actin as a loading control (1/2,000; Sigma-Aldrich). After several washes, blots were incubated with the appropriate peroxidase-coupled secondary antibodies (1/5,000; Jackson ImmunoResearch) for 1 hour and washed several times. Immunoreactivity was

revealed using the BM chemiluminescence kit (Roche) and visualized on a G:BOX gel imaging and analysis system (Syngene). Protein levels were normal for p.Ala475Pro and decreased for p.Ala32Glu variants. By contrast, the protein level of hGldn bearing the p.Pro253Leufs\*51 variant were 10 fold higher than those of WT, and appeared at a lower molecular weight as expected. Molecular weight markers are shown on the left (in kDa).

**Table S1. Sequences of Primers**

| <b>Designation</b>                                                   | <b>Primer sequences (5'-3')</b> |
|----------------------------------------------------------------------|---------------------------------|
| <b>1- Detection of <i>GLDN</i> mutation</b>                          |                                 |
| <i>Family 1</i>                                                      |                                 |
| GLDN718-F                                                            | 5'-TGGCCAGGAAACATCCCAAA-3'      |
| GLDN718-R                                                            | 5'-AGCATTAAATGGCCATCTTCCC-3'.   |
| GLDN736-F                                                            | 5'-TCCCTCCCCTTTCCCTTCCC-3'      |
| GLDN736-R                                                            | 5'-GGACAAAACCCTCCTCCCTC-3'      |
| <i>Family 2</i>                                                      |                                 |
| GldnEx1A-F                                                           | 5'-GCCACCACTACTGTCCCC-3'        |
| GldnEx1A-R                                                           | 5'-GCTCAACTCGGCCAGGAA-3'        |
| <i>Family 3</i>                                                      |                                 |
| GldnEx4-F                                                            | 5'-CTCTGCCATCACCATCCCC-3'       |
| GldnEx4-R                                                            | 5'-GTGGGACCAAGAAGTATACCCT-3'.   |
| GldnEx10A-F                                                          | 5'-CTCACAGCATTGCCCAAGG-3'       |
| GldnEx10A-R                                                          | 5'-ACCCTCATATCTTTGGTGTCTGT-3'.  |
| <i>Family 4</i>                                                      |                                 |
| GldnEx10A-F                                                          | 5'-CTCACAGCATTGCCCAAGG-3'       |
| GldnEx10A-R                                                          | 5'-ACCCTCATATCTTTGGTGTCTGT-3'.  |
| <b>2- Long Range RT-PCR amplification of <i>GLDN</i> transcripts</b> |                                 |
| GLDN-Ex1Fq                                                           | 5'-CCGCACCACCCAAGA-3'           |
| GLDN-Ex10Rq                                                          | 5'-CGTGTTGCACCACTGAGAATGT-3'    |
